# Supplementary material for: Rationale, description and baseline findings of a community-based prospective cohort study of kidney function amongst the young rural population of Northwest Nicaragua
Source: PubMed Central journal article supplement (PMC5237152; doi:10.1186/s12882-016-0422-4), 2017-01-13
Supplement: 12882_2016_422_MOESM2_ESM.pdf [file 12882_2016_422_MOESM2_ESM.pdf]

**Supplementary Table 1. Demographic, anthropometrics characteristics, lifestyle and medical history among baseline participants of the cohort study**

| Variables                                                                     | Men (n: 263)                           |                    |         | Women (n: 87)                          |                   |         |
|-------------------------------------------------------------------------------|----------------------------------------|--------------------|---------|----------------------------------------|-------------------|---------|
|                                                                               | eGFR (<90 mL/min/1.73m <sup>2</sup> )* |                    | P-value | eGFR (<90 mL/min/1.73m <sup>2</sup> )* |                   | P-value |
|                                                                               | Yes (n: 29, 11.0%)                     | No (n: 234, 90.0%) |         | Yes (n: 1, 1.1%)                       | No (n: 86, 98.9%) |         |
| Age (yrs), mean ± SD**                                                        | 24.7± 2.9                              | 23.1 ± 3.8         | 0.022   | 28.0 ± 0.0                             | 23.6 ± 3.5        | 0.202   |
| Systolic blood pressure, mean ± SD**                                          | 125.1 ± 10.3                           | 118.1 ± 9.1        | 0.002   | 113.0 ± 0.0                            | 111.1 ± 11.5      | 0.765   |
| Diastolic blood pressure, mean ± SD**                                         | 75.2 ± 7.1                             | 68.8 ± 7.3         | 0.001   | 86.0 ± 0.0                             | 68.8 ± 8.7        | 0.135   |
| Heart rate, mean ± SD**                                                       | 72.6 ± 9.8                             | 70.3 ± 8.4         | 0.256   | 86.0 ± 0.0                             | 77.3 ± 8.3        | 0.209   |
| BMI, mean ± SD**                                                              | 24.0 ± 3.7                             | 22.8 ± 3.5         | 0.092   | 21.4 ± 0.0                             | 26.3 ± 6.1        | 0.359   |
| BMI > 25 kg/m <sup>2</sup> ***                                                | 6 (20.7%)                              | 41 (17.5%)         | 0.674   | 0 (0%)                                 | 40 (46.5%)        | ---     |
| Education (yrs), mean ± SD**                                                  | 6.2 ± 4.1                              | 6.2 ± 3.4          | 0.719   | 6.0 ± 0.0                              | 7.2 ± 3.1         | 0.765   |
| Household income per person in family (córdobas; 26.72 = 1US\$), mean ± SD ** | 7340 ± 4823                            | 7794 ± 5620        | 0.802   | 4000.0 ± 0                             | 6491 ± 4597       | 0.536   |
| Total number of family members who depend on the household income**           | 4.3 ± 1.6                              | 4.9 ± 2.4          | 0.461   | 3.0 ± 0.0                              | 4.5 ± 2.2         | 0.324   |
| Age of first job, paid or unpaid, mean ± SD**                                 | 14.3 ± 3.2                             | 14.6 ± 3.2         | 0.756   | 18.0 ± 0.0                             | 15.3 ± 3.8        | 0.389   |
| Ever smoked***                                                                | 20 (69.0%)                             | 122 (52.1%)        | 0.086   | 0 (0%)                                 | 2 (2.3%)          | ---     |
| Ever drank alcohol***                                                         | 25 (86.2%)                             | 156 (66.6%)        | 0.032   | 1 (100.0%)                             | 12 (14.0%)        | ---     |
| NSAIDs***                                                                     | 22 (75.9%)                             | 195 (83.3%)        | 0.318   | 0 (0%)                                 | 79 (91.9%)        | ---     |
| Nephrotoxic antibiotics***                                                    | 6 (20.7%)                              | 27 (11.5%)         | 0.161   | 0 (0%)                                 | 16 (18.6%)        | ---     |
| Hypertension***                                                               | 2 (6.9%)                               | 2 (0.9%)           | 0.061   | 0 (0%)                                 | 6 (7.0%)          | ---     |
| History diabetes***                                                           | 0 (0%)                                 | 0 (0%)             | ---     | 0 (0%)                                 | 0 (0%)            | ---     |
| History kidney stones***                                                      | 0 (0%)                                 | 1 (0.4%)           | ---     | 0 (0%)                                 | 3 (3.4%)          | ---     |
| History urinary tract infections (UTI)***                                     | 8 (27.5%)                              | 48 (20.5%)         | 0.470   | 0 (0%)                                 | 35 (40.6%)        | ---     |

\* eGFR was defined as eCKD-Epi GFR <90 mL/min/1.73m<sup>2</sup>. \*\* Kruskal-Wallis for not normally distributed continuous variables. \*\*\* Chi-square test for categorical variables or Fisher exact test at expected frequencies <5.

Abbreviations: BMI: Body Mass Index, eGFR: Estimated Glomerular Filtration Rate, NSAIDs: Non-steroidal Anti-inflammatory Drugs.

**Supplementary Table 2: Potential risk factors for heat stress among men and women**

| Variables                                            | Men (n: 263)                           |                    |         | Women (n: 87)                          |                   |
|------------------------------------------------------|----------------------------------------|--------------------|---------|----------------------------------------|-------------------|
|                                                      | eGFR (<90 mL/min/1.73m <sup>2</sup> )* |                    |         | eGFR (<90 mL/min/1.73m <sup>2</sup> )* |                   |
|                                                      | Yes (n: 29, 11.0%)                     | No (n: 234, 90.0%) | P-value | Yes (n: 1, 1.1%)                       | No (n: 86, 98.9%) |
| Years of working life, mean ± SD**                   | 10.2 ± 3.9                             | 8.4 ± 4.7          | 0.032   | 10.0                                   | 8.2 ± 4.9         |
| Work hours per day, mean ± SD**                      | 7.1 ± 1.9                              | 7.2 ± 2.4          | 0.890   | 10.0                                   | 8.0 ± 2.0         |
| Total duration breaks per day (minutes), mean ± SD** | 29.8 ± 27.1                            | 22.7 ± 20.1        | 0.378   | 60.0                                   | 45.0 ± 45.2       |
| Number of breaks per day, mean ± SD                  | 2.4 ± 1.5                              | 2.5 ± 1.6          | 0.651   | 3.0                                    | 2.3 ± 1.0         |
| Very rapid work pace (%)***                          | 5 (17.2%)                              | 91 (38.8%)         | 0.022   | no                                     | 27 (31.3%)        |
| Hot environment in current job (%)***                | 5 (17.2%)                              | 47 (20.1%)         | 0.717   | no                                     | 3 (3.5%)          |
| Lifting weights > 50 pounds (%)***                   | 6 (20.6%)                              | 54 (23.0%)         | 0.773   | no                                     | 5 (5.8%)          |
| Physical effort in the last week                     | 16 (55.1%)                             | 133 (56.8%)        | 0.864   | no                                     | 44 (51.1%)        |
| Ever fainted due to work (%)***                      | 2 (6.8%)                               | 8 (3.4%)           | 0.304   | no                                     | 5 (5.8%)          |
| Weight loss in current job (self-reported)***        | 8 (27.5%)                              | 85 (36.3%)         | 0.353   | no                                     | 30 (34.8%)        |

\*eGFR was defined as eGFR <90 mL/min/1.73m<sup>2</sup>; \*\* Kruskal-Wallis for not normally distributed continuous variables;\*\*\* chi-square test for categorical variables or Fisher exact test at expected cell frequencies <5.
