# Supplementary material for: Rationale, description and baseline findings of a community-based prospective cohort study of kidney function amongst the young rural population of Northwest Nicaragua
Source: Springer Nature journal article supplement (doi:10.1186/s12882-016-0422-4), 2017-01-13
Supplement: MOESM1 [file 11998316]

## RESEARCH

### BASELINE QUESTIONNAIRE (O\_CKD\_PC)

Questionnaire code \_\_\_\_\_ Community code \_\_\_\_\_

Date \_\_/\_\_/\_\_ Hour: \_\_\_\_\_

Good morning, my name is \_\_\_\_\_, I work at the National Autonomous University of Nicaragua, León. We are collaborating with London School of Hygiene and Tropical Medicine and University College London in a research Project of Chronic Kidney Disease in North-western Nicaragua.

Before starting with the questionnaire, we would like to ask you if are you agree to be part of this study? If you agree to enrol in this study, please sign the inform consent.

### Anthropometrics measurements

Weight  kg Height  meter

Blood pressure:  /  mm/Hg (Systolic/diastolic)

Samples (mark with a X if you took it) Blood \_\_\_\_\_ Urine: \_\_\_\_\_ Water \_\_\_\_\_

**You will now be asked questions about different aspects related to your life and work.**

| DEMOGRAPHICS                                                                                                    |                                                                                                                                                                                                                                |
|-----------------------------------------------------------------------------------------------------------------|--------------------------------------------------------------------------------------------------------------------------------------------------------------------------------------------------------------------------------|
| 1) Age <input type="text"/> <input type="text"/> year old                                                       | 2) Sex 1. Women <input type="checkbox"/> 2. Men <input type="checkbox"/>                                                                                                                                                       |
| 3) Last year of school approved (Write the last grade or year approved )<br><br>Total of schooling years: _____ | <input type="text"/> <input type="text"/> 1.Primary <input type="text"/> <input type="text"/> 2. Secondary<br><input type="text"/> <input type="text"/> 3. Polytechnic <input type="text"/> <input type="text"/> 4. University |
| SOCIOECONOMIC CONDITIONS                                                                                        |                                                                                                                                                                                                                                |
| 4) How many of your family members living in the same house are currently working?                              | <input type="text"/> <input type="text"/>                                                                                                                                                                                      |
| 5) How much do you earn?                                                                                        | C\$ <input type="text"/> <input type="text"/> <input type="text"/> <input type="text"/> <input type="text"/> monthly,                                                                                                          |

# BASELINE QUESTIONNAIRE | 2014

|                                                                                                                                          |                                                                                                                                                                                                                                                                                                                                                                                                                                                                                                                                                                                                                                                                                                                                                                                                                                                                                                                                                                                                                                                                                                        |
|------------------------------------------------------------------------------------------------------------------------------------------|--------------------------------------------------------------------------------------------------------------------------------------------------------------------------------------------------------------------------------------------------------------------------------------------------------------------------------------------------------------------------------------------------------------------------------------------------------------------------------------------------------------------------------------------------------------------------------------------------------------------------------------------------------------------------------------------------------------------------------------------------------------------------------------------------------------------------------------------------------------------------------------------------------------------------------------------------------------------------------------------------------------------------------------------------------------------------------------------------------|
| <b>6) How much is your family income per month?</b><br><br>(Sum the entry in Córdobas of ALL family members and remittances from abroad) | <div style="text-align: right;">Salaries = C\$ <input style="width: 30px;" type="text"/> <input style="width: 30px;" type="text"/> <input style="width: 30px;" type="text"/> <input style="width: 30px;" type="text"/> <input style="width: 30px;" type="text"/></div> <div style="text-align: right;">Family remittances = C\$ <input style="width: 30px;" type="text"/> <input style="width: 30px;" type="text"/> <input style="width: 30px;" type="text"/> <input style="width: 30px;" type="text"/> <input style="width: 30px;" type="text"/></div> <div style="text-align: right;">Other income = C\$ <input style="width: 30px;" type="text"/> <input style="width: 30px;" type="text"/> <input style="width: 30px;" type="text"/> <input style="width: 30px;" type="text"/> <input style="width: 30px;" type="text"/></div> <div style="text-align: right;">Total = c\$ <input style="width: 30px;" type="text"/> <input style="width: 30px;" type="text"/> <input style="width: 30px;" type="text"/> <input style="width: 30px;" type="text"/> <input style="width: 30px;" type="text"/></div> |
| <b>7) How many people depend on that income?</b>                                                                                         | Children <input style="width: 30px;" type="text"/> <input style="width: 30px;" type="text"/> + Adults <input style="width: 30px;" type="text"/> <input style="width: 30px;" type="text"/> Total= <input style="width: 30px;" type="text"/> <input style="width: 30px;" type="text"/>                                                                                                                                                                                                                                                                                                                                                                                                                                                                                                                                                                                                                                                                                                                                                                                                                   |
| <b>8) Where does the water you drink come from? (check more than one options)</b>                                                        | Well <input type="checkbox"/> River <input type="checkbox"/> Waterhole <input type="checkbox"/> Piped water <input type="checkbox"/><br>(if it is well, fill the additional questions)<br><br>Perforated: 1. Yes <input type="checkbox"/> 2. No <input type="checkbox"/><br><br>Excavated: 1. Yes <input type="checkbox"/> 2. No <input type="checkbox"/><br><br>Protected: 1. Yes <input type="checkbox"/> 2. No <input type="checkbox"/><br><br>Agricultural plantations near the water source: 1. Yes <input type="checkbox"/><br>(Consider crops close at 100 mts) 2. No <input type="checkbox"/><br><br>Type of crops: _____<br>_____                                                                                                                                                                                                                                                                                                                                                                                                                                                             |
| <b>9) Do you treat the drinking water? (Boiling, chlorine, etc.)</b>                                                                     | 1. Boiling <input type="checkbox"/> 2. Chlorine <input type="checkbox"/> 3. Home filters <input type="checkbox"/><br>4. Other <input type="checkbox"/> _____ 5. None <input type="checkbox"/>                                                                                                                                                                                                                                                                                                                                                                                                                                                                                                                                                                                                                                                                                                                                                                                                                                                                                                          |
| <b>10) Where do you defecate (take a dump or have a dump?)</b>                                                                           | 1. Latrine <input type="checkbox"/> 2. Toilet <input type="checkbox"/> 3. Outdoor <input type="checkbox"/>                                                                                                                                                                                                                                                                                                                                                                                                                                                                                                                                                                                                                                                                                                                                                                                                                                                                                                                                                                                             |
| <b>CURRENT OCCUPATION</b>                                                                                                                |                                                                                                                                                                                                                                                                                                                                                                                                                                                                                                                                                                                                                                                                                                                                                                                                                                                                                                                                                                                                                                                                                                        |
| <b>11) What is your current job? (Agriculture, sugarcane cutter, farmer, water applicator construction, etc)</b>                         | _____<br>_____                                                                                                                                                                                                                                                                                                                                                                                                                                                                                                                                                                                                                                                                                                                                                                                                                                                                                                                                                                                                                                                                                         |
| <b>12) What task do you perform?</b>                                                                                                     | _____<br>_____                                                                                                                                                                                                                                                                                                                                                                                                                                                                                                                                                                                                                                                                                                                                                                                                                                                                                                                                                                                                                                                                                         |
| <b>13) How many years have you been working in your current job?</b>                                                                     | <input style="width: 30px;" type="text"/> <input style="width: 30px;" type="text"/> years <input style="width: 30px;" type="text"/> <input style="width: 30px;" type="text"/> months                                                                                                                                                                                                                                                                                                                                                                                                                                                                                                                                                                                                                                                                                                                                                                                                                                                                                                                   |

# BASELINE QUESTIONNAIRE | 2014

|                                                                             |                                                                               |
|-----------------------------------------------------------------------------|-------------------------------------------------------------------------------|
| <b>14) How many months in a year do you work?</b>                           | <input type="text"/> <input type="text"/> months                              |
| <b>15) How many hours do you work daily?</b>                                | <input type="text"/> <input type="text"/> <input type="text"/> hours          |
| <b>16) Do you work on your own or for someone else?</b>                     | 1. On my own <input type="checkbox"/> 2. For someone <input type="checkbox"/> |
| <b>17) Are you affiliated to the national social security system?</b>       | 1. Yes <input type="checkbox"/> 2. No <input type="checkbox"/>                |
| <b>18) What age do you had when you started working for the first time?</b> | _____ Year old                                                                |

## OCCUPATIONS HISTORY

**19) Since you started working, what have you worked for?**

*(not include those jobs with less than 3 months. Begin with the first and finish the last job (no include the current job). Include the unemployed period, please*

| Age | Occupation <small>(example: agricultural worker, construction worker, Vendor, etc)</small> | What task did you perform? <small>(Example: seeder, Construction, apply pesticide, etc.)</small> | How long have you been working <small>(years)</small> | How many days did you work per week? | How many hours did you work per day? |
|-----|--------------------------------------------------------------------------------------------|--------------------------------------------------------------------------------------------------|-------------------------------------------------------|--------------------------------------|--------------------------------------|
|     |                                                                                            |                                                                                                  |                                                       |                                      |                                      |
|     |                                                                                            |                                                                                                  |                                                       |                                      |                                      |
|     |                                                                                            |                                                                                                  |                                                       |                                      |                                      |
|     |                                                                                            |                                                                                                  |                                                       |                                      |                                      |
|     |                                                                                            |                                                                                                  |                                                       |                                      |                                      |
|     |                                                                                            |                                                                                                  |                                                       |                                      |                                      |
|     |                                                                                            |                                                                                                  |                                                       |                                      |                                      |
|     |                                                                                            |                                                                                                  |                                                       |                                      |                                      |

|  |  |  |  |  |  |
|--|--|--|--|--|--|
|  |  |  |  |  |  |
|  |  |  |  |  |  |
|  |  |  |  |  |  |

### HEAT EXPOSURES

|                                                                                                      |                                                                                                        |
|------------------------------------------------------------------------------------------------------|--------------------------------------------------------------------------------------------------------|
| <b>20) Your work is carried out mostly?:</b>                                                         | 1. Indoors.<br>2. Mostly indoors.<br>3. Outdoors.<br>4. Mostly outdoors<br>5. Other, specify:<br>_____ |
| <b>21) Do you work in a very hot working environment?</b>                                            | 1. Seldom or never.<br>2. Few times.<br>3. Regularly.<br>4. Frequently.<br>5. Always or almost always. |
| <b>22) If it is regularly or more often: ¿Do you have possibilities to cool off when you needed?</b> | 1.No <input type="checkbox"/><br>2. Yes <input type="checkbox"/> specify: _____                        |
| <b>23) Do you have breaks during your workday?</b>                                                   | 1. Yes <input type="checkbox"/> 2.No <input type="checkbox"/>                                          |
| <b>24) What is the total duration of your breaks?</b> (no including the lunch break, please)         | <input type="text"/> <input type="text"/> <input type="text"/> minutes                                 |
| <b>25) How often do you take breaks?</b>                                                             | <input type="text"/> <input type="text"/> times                                                        |
| <b>26) How long do you take for your lunch time?</b>                                                 | <input type="text"/> <input type="text"/> <input type="text"/> minutes                                 |
| <b>27) Is there shade available during breaks in your workplace?</b>                                 | 1.Yes <input type="checkbox"/> 2.No <input type="checkbox"/>                                           |
| <b>28) Do you work at a high work speed?</b>                                                         | 1. Yes <input type="checkbox"/> 2.No <input type="checkbox"/>                                          |
| <b>29) If it is yes: Do you have possibility to slow down when needed?</b>                           | 1. Yes <input type="checkbox"/> 2.No <input type="checkbox"/>                                          |

# BASELINE QUESTIONNAIRE | 2014

|                                                                                                    |                                                                                                                                                                                                                                                                                                                                            |                                   |
|----------------------------------------------------------------------------------------------------|--------------------------------------------------------------------------------------------------------------------------------------------------------------------------------------------------------------------------------------------------------------------------------------------------------------------------------------------|-----------------------------------|
| <b>30) If it is not, explain why?</b>                                                              | _____                                                                                                                                                                                                                                                                                                                                      |                                   |
| <b>31) How long time do you take to commute to your workplace?</b>                                 | <input type="text"/> <input type="text"/> <input type="text"/> minutes                                                                                                                                                                                                                                                                     |                                   |
| <b>32) What is your means of transportation to the workplace?</b>                                  | <input type="checkbox"/> 1. Bike <span style="margin-left: 100px;"><input type="checkbox"/> 2. On foot</span><br><input type="checkbox"/> 3. Open truck, sitting.<br><input type="checkbox"/> 4. Open truck, standing<br><input type="checkbox"/> 5. Bus. <span style="margin-left: 20px;"><input type="checkbox"/> 6. Other:</span> _____ |                                   |
| <b>33) When you have arrived at work, are you already get sweating heavily?</b>                    | 1.Yes <input type="checkbox"/> 2.No <input type="checkbox"/>                                                                                                                                                                                                                                                                               |                                   |
| <b>34) Do you push, throw or lift heavy objects or equipment?</b>                                  | 1.Yes <input type="checkbox"/> 2.No <input type="checkbox"/>                                                                                                                                                                                                                                                                               |                                   |
| <b>35) If handling heavy loads, what is the approximate weight(s) of the objects or equipment?</b> | <input type="checkbox"/> 1. Up to 25 lbs<br><input type="checkbox"/> 2. Between 26 y 50 lbs<br><input type="checkbox"/> 3. Between 51 y 100 lbs<br><input type="checkbox"/> 4. More than 100 lbs                                                                                                                                           |                                   |
| <b>36) How much physical effort did you exert last week at work?</b>                               | <input type="checkbox"/> 1. Slight effort<br><input type="checkbox"/> 2. Moderate effort<br><input type="checkbox"/> 3. Hard effort<br><input type="checkbox"/> 4. Very hard effort<br><input type="checkbox"/> 5. Did not work last week                                                                                                  |                                   |
| <b>37) Have you worked on a cotton plantation?</b>                                                 | 1.Yes <input type="checkbox"/> 2.No <input type="checkbox"/> (If it is no go to the question 38)                                                                                                                                                                                                                                           |                                   |
| <b>If it is yes</b>                                                                                | <b>How long have you worked?</b>                                                                                                                                                                                                                                                                                                           | <b>What task did you perform?</b> |
|                                                                                                    |                                                                                                                                                                                                                                                                                                                                            |                                   |

# BASELINE QUESTIONNAIRE | 2014

|                                                                                  |                                          |                                                                                                                                              |                                         |
|----------------------------------------------------------------------------------|------------------------------------------|----------------------------------------------------------------------------------------------------------------------------------------------|-----------------------------------------|
| 38) Do or have you worked in a banana plantation?                                |                                          | 1.Yes <input type="checkbox"/> 2.No <input type="checkbox"/> (if it is no go to question 39)                                                 |                                         |
| If yes                                                                           | <b>How long do or have you work(ed)?</b> |                                                                                                                                              | <b>What task do or did you perform?</b> |
|                                                                                  |                                          |                                                                                                                                              |                                         |
| 39) Do you work or have you been working in a banana packaging plant?            |                                          | 1.Yes <input type="checkbox"/> <input type="text"/> <input type="text"/> Years 2.No <input type="checkbox"/> (If it is no go to question 40) |                                         |
| 40) If you are not currently working in sugarcane, have you worked in sugarcane? |                                          | 1.Yes <input type="checkbox"/> 2.No <input type="checkbox"/> (if it is no go to question 41)                                                 |                                         |
| If it is yes                                                                     | How many years have you worked?          | How many months have you worked in a year?                                                                                                   | What kind of tasks have you performed?  |
|                                                                                  |                                          |                                                                                                                                              |                                         |
|                                                                                  |                                          |                                                                                                                                              |                                         |
|                                                                                  |                                          |                                                                                                                                              |                                         |

**HYDRATATION HABITS** (calculate in litres always, for example. 1 glass = 0.250 L)

**Could you tell me about the drinks that you drank yesterday, if you drank and how much you drank since you woke up?**

**On waking**

|                                                              |                                                                                                                                                                                                                                               |                                                                                               |
|--------------------------------------------------------------|-----------------------------------------------------------------------------------------------------------------------------------------------------------------------------------------------------------------------------------------------|-----------------------------------------------------------------------------------------------|
| 41) Did you drink something?                                 | 42) What did you drink?                                                                                                                                                                                                                       | 43) How much did you drink?                                                                   |
| 1.Yes <input type="checkbox"/> 2.No <input type="checkbox"/> | <div style="border-bottom: 1px solid black; height: 15px; margin-bottom: 5px;"></div> <div style="border-bottom: 1px solid black; height: 15px; margin-bottom: 5px;"></div> <div style="border-bottom: 1px solid black; height: 15px;"></div> | <div style="border-bottom: 1px solid black; width: 80%; display: inline-block;"></div> Litres |

 Litres

# BASELINE QUESTIONNAIRE | 2014

|                                                              |                                                                                                                                                                                                                                               |                                                                                              |
|--------------------------------------------------------------|-----------------------------------------------------------------------------------------------------------------------------------------------------------------------------------------------------------------------------------------------|----------------------------------------------------------------------------------------------|
| 1.Yes <input type="checkbox"/> 2.No <input type="checkbox"/> | <div style="border-bottom: 1px solid black; height: 15px; margin-bottom: 5px;"></div> <div style="border-bottom: 1px solid black; height: 15px; margin-bottom: 5px;"></div> <div style="border-bottom: 1px solid black; height: 15px;"></div> | <div style="border-bottom: 1px solid black; height: 15px; margin-bottom: 5px;"></div> Litres |
| <b>At noon</b>                                               |                                                                                                                                                                                                                                               |                                                                                              |
| <b>47) Did you drink something?</b>                          | <b>48) What did you drink?</b>                                                                                                                                                                                                                | <b>49) How much did you drink?</b>                                                           |
| 1.Yes <input type="checkbox"/> 2.No <input type="checkbox"/> | <div style="border-bottom: 1px solid black; height: 15px; margin-bottom: 5px;"></div> <div style="border-bottom: 1px solid black; height: 15px; margin-bottom: 5px;"></div> <div style="border-bottom: 1px solid black; height: 15px;"></div> | <div style="border-bottom: 1px solid black; height: 15px; margin-bottom: 5px;"></div> Litres |
| <b>Afternoon</b>                                             |                                                                                                                                                                                                                                               |                                                                                              |
| <b>50) Did you drink something?</b>                          | <b>51) What did you drink?</b>                                                                                                                                                                                                                | <b>52) How much did you drink?</b>                                                           |
| 1.Yes <input type="checkbox"/> 2.No <input type="checkbox"/> | <div style="border-bottom: 1px solid black; height: 15px; margin-bottom: 5px;"></div> <div style="border-bottom: 1px solid black; height: 15px; margin-bottom: 5px;"></div> <div style="border-bottom: 1px solid black; height: 15px;"></div> | <div style="border-bottom: 1px solid black; height: 15px; margin-bottom: 5px;"></div> Litres |
| <b>During dinner</b>                                         |                                                                                                                                                                                                                                               |                                                                                              |
| <b>53) Did you drink something?</b>                          | <b>54) What did you drink?</b>                                                                                                                                                                                                                | <b>55) How much did you drink?</b>                                                           |
| 1.Yes <input type="checkbox"/> 2.No <input type="checkbox"/> | <div style="border-bottom: 1px solid black; height: 15px; margin-bottom: 5px;"></div> <div style="border-bottom: 1px solid black; height: 15px; margin-bottom: 5px;"></div> <div style="border-bottom: 1px solid black; height: 15px;"></div> | <div style="border-bottom: 1px solid black; height: 15px; margin-bottom: 5px;"></div> Litres |
| <b>After dinner</b>                                          |                                                                                                                                                                                                                                               |                                                                                              |
| <b>56) Did you drink something?</b>                          | <b>57) What did you drink?</b>                                                                                                                                                                                                                | <b>58) How much did you drink?</b>                                                           |
| 1.Yes <input type="checkbox"/> 2.No <input type="checkbox"/> | <div style="border-bottom: 1px solid black; height: 15px; margin-bottom: 5px;"></div> <div style="border-bottom: 1px solid black; height: 15px; margin-bottom: 5px;"></div> <div style="border-bottom: 1px solid black; height: 15px;"></div> | <div style="border-bottom: 1px solid black; height: 15px; margin-bottom: 5px;"></div> Litres |

# BASELINE QUESTIONNAIRE | 2014

|                                                                                                                      |                                                                                   |                                                                                                                                                 |                                               |
|----------------------------------------------------------------------------------------------------------------------|-----------------------------------------------------------------------------------|-------------------------------------------------------------------------------------------------------------------------------------------------|-----------------------------------------------|
| <b>If the interviewee is a worker:</b>                                                                               |                                                                                   |                                                                                                                                                 |                                               |
| <b>59) Did you go to work yesterday?</b>                                                                             |                                                                                   | 1.Yes <input type="checkbox"/> 2.No <input type="checkbox"/>                                                                                    |                                               |
| <b>60) If not, When you work do you drink more fluids?</b>                                                           |                                                                                   | 1. Much more <input type="checkbox"/> 2. More <input type="checkbox"/><br>3. The same <input type="checkbox"/> 4. Less <input type="checkbox"/> |                                               |
| <b>OTHER HABITS</b>                                                                                                  |                                                                                   |                                                                                                                                                 |                                               |
| <b>61) Do you currently smoke?</b>                                                                                   |                                                                                   | 1.Yes <input type="checkbox"/> 2.No <input type="checkbox"/> <i>(if it is no go to question 64)</i>                                             |                                               |
| <b>62) How many cigarette do you smoke a day?</b>                                                                    |                                                                                   | <input type="text"/> <input type="text"/> cigarette/day                                                                                         |                                               |
| <b>63) What age did you start of smoking?</b>                                                                        |                                                                                   | <input type="text"/> <input type="text"/> Years                                                                                                 |                                               |
| <b>64) if you do not currently smoke: Did you smoke before?</b>                                                      |                                                                                   | 1.Yes <input type="checkbox"/> 2.No <input type="checkbox"/> <i>(if it is no go to question 69)</i>                                             |                                               |
| <b>65) How many cigarettes did you smoke a day?</b>                                                                  |                                                                                   | <input type="text"/> <input type="text"/>                                                                                                       |                                               |
| <b>66) What age did you start of smoking and at what age did you stop of smoking?</b>                                |                                                                                   | <input type="text"/> <input type="text"/> Age at start. <input type="text"/> <input type="text"/> Age at finish                                 |                                               |
| <b>67) If you smoke intermittently, how many years have you smoked?</b>                                              |                                                                                   | _____ Years smoked                                                                                                                              |                                               |
| <b>68) Do you currently drink alcohol?</b>                                                                           |                                                                                   | 1.Yes <input type="checkbox"/> 2.No <input type="checkbox"/> <i>(if it is no go to question 70)</i>                                             |                                               |
| <b>69) What kind of alcohol do you drink?</b> <i>(Include all kind alcohol beverage that the interviewee drinks)</i> |                                                                                   |                                                                                                                                                 |                                               |
| <b>Type</b>                                                                                                          | <b>Quantity</b>                                                                   | <b>Frequency</b> <i>(Daily, Weekly, Monthly, etc.)</i>                                                                                          | <b>Years of drinking this type of alcohol</b> |
| Beer <input type="checkbox"/>                                                                                        | <input type="text"/> <input type="text"/> bottles 12 ounces (1 liter = 3 bottles) |                                                                                                                                                 | <input type="text"/> <input type="text"/>     |
| Rum <input type="checkbox"/>                                                                                         | <input type="text"/> <input type="text"/> Shoot (1 small bottle = 13 shoots)      |                                                                                                                                                 | <input type="text"/> <input type="text"/>     |
| Caballito/Perla/Ron plata<br><input type="checkbox"/>                                                                | <input type="text"/> <input type="text"/> shoot (1 small bottle = 13 shoots)      |                                                                                                                                                 | <input type="text"/> <input type="text"/>     |



# BASELINE QUESTIONNAIRE | 2014

|                                                                                                                                                                                 |                                                                                   |                                                                                               |                                               |                                             |                |                                                |                |
|---------------------------------------------------------------------------------------------------------------------------------------------------------------------------------|-----------------------------------------------------------------------------------|-----------------------------------------------------------------------------------------------|-----------------------------------------------|---------------------------------------------|----------------|------------------------------------------------|----------------|
| Other <input type="checkbox"/> (Wine, vodka, tequila, etc.)                                                                                                                     | <input type="text"/> <input type="text"/> _____                                   |                                                                                               | <input type="text"/> <input type="text"/>     |                                             |                |                                                |                |
| <b>70) If you do not drink now, did you drink before?</b>                                                                                                                       |                                                                                   | <input type="checkbox"/> 1.Yes <input type="checkbox"/> 2.No (If it is no go to question 71)  |                                               |                                             |                |                                                |                |
| <b>Type</b>                                                                                                                                                                     | <b>Quantity</b>                                                                   | <b>Frequency</b> (daily, Weekly, Monthly, etc.)                                               | <b>Years of drinking this type of alcohol</b> |                                             |                |                                                |                |
| Beer <input type="checkbox"/>                                                                                                                                                   | <input type="text"/> <input type="text"/> bottles 12 ounces (1 liter = 3 bottles) |                                                                                               | <input type="text"/> <input type="text"/>     |                                             |                |                                                |                |
| Rum <input type="checkbox"/>                                                                                                                                                    | <input type="text"/> <input type="text"/> Shoot (1 small bottle = 13 shoots)      |                                                                                               | <input type="text"/> <input type="text"/>     |                                             |                |                                                |                |
| Caballito/Perla/Ron plata/<br><input type="checkbox"/>                                                                                                                          | <input type="text"/> <input type="text"/> shoot (1 small bottle = 13 shoots)      |                                                                                               | <input type="text"/> <input type="text"/>     |                                             |                |                                                |                |
| Other <input type="checkbox"/> _____<br>(Wine, vodka, tequila, etc.)                                                                                                            | <input type="text"/> <input type="text"/> _____                                   |                                                                                               | <input type="text"/> <input type="text"/>     |                                             |                |                                                |                |
| <b>71) Do you take or have you taken illegal drugs?</b>                                                                                                                         |                                                                                   | <input type="checkbox"/> 1.Yes <input type="checkbox"/> 2.No (If it is no, go to question 73) |                                               |                                             |                |                                                |                |
| <b>72)</b>                                                                                                                                                                      | <b>Answers the following questions</b>                                            | <b>1. Have you ever tried in your life?</b>                                                   |                                               | <b>2. Have you smoked in the last year?</b> |                | <b>3. Have you smoked in the last 30 days?</b> |                |
|                                                                                                                                                                                 | 1. Marijuana                                                                      | 1.Yes    2.No                                                                                 | 1.Yes    2.No                                 | 1.Yes    2.No                               | 1.Yes    2.No  | 1.Yes    2.No                                  | 1.Yes    2.No  |
|                                                                                                                                                                                 | 2. Floripon (angel's trumpet)                                                     | 1. Yes    2.No                                                                                | 1. Yes    2.No                                | 1. Yes    2.No                              | 1. Yes    2.No | 1. Yes    2.No                                 | 1. Yes    2.No |
|                                                                                                                                                                                 | 3. Mushrooms                                                                      | 1. Yes    2.No                                                                                | 1. Yes    2.No                                | 1. Yes    2.No                              | 1. Yes    2.No | 1. Yes    2.No                                 | 1. Yes    2.No |
|                                                                                                                                                                                 | 4. Cocaine                                                                        | 1. Yes    2.No                                                                                | 1. Yes    2.No                                | 1. Yes    2.No                              | 1. Yes    2.No | 1. Yes    2.No                                 | 1. Yes    2.No |
|                                                                                                                                                                                 | 5. Crack                                                                          | 1. Yes    2.No                                                                                | 1. Yes    2.No                                | 1. Yes    2.No                              | 1. Yes    2.No | 1. Yes    2.No                                 | 1. Yes    2.No |
|                                                                                                                                                                                 | 6. Glue                                                                           | 1. Yes    2.No                                                                                | 1. Yes    2.No                                | 1. Yes    2.No                              | 1. Yes    2.No | 1. Yes    2.No                                 | 1. Yes    2.No |
|                                                                                                                                                                                 | 7. Other drugs (specify):                                                         | 1. Yes    2.No                                                                                | 1. Yes    2.No                                | 1. Yes    2.No                              | 1. Yes    2.No | 1. Yes    2.No                                 | 1. Yes    2.No |
| <b>HEALTH AND WELFARE</b>                                                                                                                                                       |                                                                                   |                                                                                               |                                               |                                             |                |                                                |                |
| <b>73) How do you consider your health status?</b>                                                                                                                              |                                                                                   |                                                                                               |                                               |                                             |                |                                                |                |
| <input type="checkbox"/> 1. Very good <input type="checkbox"/> 2. Good <input type="checkbox"/> 3. Regular <input type="checkbox"/> 4. Bad <input type="checkbox"/> 5. Very bad |                                                                                   |                                                                                               |                                               |                                             |                |                                                |                |
| <b>74) How often do you do exercise?</b>                                                                                                                                        |                                                                                   |                                                                                               |                                               |                                             |                |                                                |                |

|                                                                                                                                                                                                                                                                                      |                                                                                                                                                                                                                                                                                                                                                                                                                                         |
|--------------------------------------------------------------------------------------------------------------------------------------------------------------------------------------------------------------------------------------------------------------------------------------|-----------------------------------------------------------------------------------------------------------------------------------------------------------------------------------------------------------------------------------------------------------------------------------------------------------------------------------------------------------------------------------------------------------------------------------------|
| <input type="checkbox"/> 1. Never <input type="checkbox"/> 2. Occasionally <input type="checkbox"/> 3. 2 to 3 times x week <input type="checkbox"/> 4. 4 to 5 times x week <input type="checkbox"/> 5. Every days                                                                    |                                                                                                                                                                                                                                                                                                                                                                                                                                         |
| <b>75) How often do you eat fruits, vegetables and salads?</b>                                                                                                                                                                                                                       |                                                                                                                                                                                                                                                                                                                                                                                                                                         |
| <input type="checkbox"/> 1. Never <input type="checkbox"/> 2. Occasionally <input type="checkbox"/> 3. 2 to 3 times x week <input type="checkbox"/> 4. 4 to 5 times x week <input type="checkbox"/> 5. Every days                                                                    |                                                                                                                                                                                                                                                                                                                                                                                                                                         |
| <b>76) ¿Do you eat your food without salt or with very Little salt?</b>                                                                                                                                                                                                              |                                                                                                                                                                                                                                                                                                                                                                                                                                         |
| <input type="checkbox"/> 1. Always <input type="checkbox"/> 2. Most of the time <input type="checkbox"/> 3. Few times <input type="checkbox"/> 4. Never <input type="checkbox"/> 5. Add salt to my food                                                                              |                                                                                                                                                                                                                                                                                                                                                                                                                                         |
| <b>77) In the last 4 weeks have you felt?</b>                                                                                                                                                                                                                                        |                                                                                                                                                                                                                                                                                                                                                                                                                                         |
| <b>a) Back pain?</b>                                                                                                                                                                                                                                                                 |                                                                                                                                                                                                                                                                                                                                                                                                                                         |
| <input type="checkbox"/> 1. Cervical <input type="checkbox"/> 2. Thoracic <input type="checkbox"/> 3. Lumbosacral <input type="checkbox"/> 4. Has not felt anything                                                                                                                  |                                                                                                                                                                                                                                                                                                                                                                                                                                         |
| <b>b) Arm or leg pain?</b>                                                                                                                                                                                                                                                           |                                                                                                                                                                                                                                                                                                                                                                                                                                         |
| <input type="checkbox"/> 1. Shoulders <input type="checkbox"/> 2. Elbows <input type="checkbox"/> 3. Wrists <input type="checkbox"/> 4. Hands <input type="checkbox"/> 5. Knee <input type="checkbox"/> 6. Ankles <input type="checkbox"/> 7. Feet <input type="checkbox"/> 5. Other |                                                                                                                                                                                                                                                                                                                                                                                                                                         |
| <b>78) In the last 12 months of work, have you suffered any injuries (injury, fracture, etc) due to an accident at work?</b>                                                                                                                                                         | <input type="checkbox"/> 1. Yes <input type="checkbox"/> 2. No <b>¿Specify?</b><br>_____                                                                                                                                                                                                                                                                                                                                                |
| <b>Nephrotoxic medications</b> (show the catalogue)                                                                                                                                                                                                                                  |                                                                                                                                                                                                                                                                                                                                                                                                                                         |
| <b>79) Have you taken any of these pain medications that you see in the catalogue?</b>                                                                                                                                                                                               | <input type="checkbox"/> 1. Yes <input type="checkbox"/> 2. No                                                                                                                                                                                                                                                                                                                                                                          |
| <b>80) Ibuprofen, Diclofenac,</b>                                                                                                                                                                                                                                                    | <input type="checkbox"/> 0. Never<br><input type="checkbox"/> 1. Only occasionally<br><input type="checkbox"/> 2. Regularly or intermittently<br><input type="checkbox"/> 1. For 1 month or more (___ months)<br><input type="checkbox"/> 2. Less than a month (___ weeks)<br><input type="checkbox"/> 3. Daily<br><input type="checkbox"/> 1. For a week or more (___ week)<br><input type="checkbox"/> 2. Less than a week (___ days) |
| <b>81) Aspirin</b>                                                                                                                                                                                                                                                                   | <input type="checkbox"/> 0. Never<br><input type="checkbox"/> 1. Only occasionally<br><input type="checkbox"/> 2. Regularly or intermittently<br><input type="checkbox"/> 1. For 1 month or more (___ months)<br><input type="checkbox"/> 2. Less than a month (___ weeks)                                                                                                                                                              |

|                                                                                                                              |                                                                                                                                                                                                                                                                                                                                                                                                                                   |
|------------------------------------------------------------------------------------------------------------------------------|-----------------------------------------------------------------------------------------------------------------------------------------------------------------------------------------------------------------------------------------------------------------------------------------------------------------------------------------------------------------------------------------------------------------------------------|
|                                                                                                                              | <input type="checkbox"/> 3.Daily<br><input type="checkbox"/> 1.For a week or more (___ week)<br><input type="checkbox"/> 2.Less than a week (___ days)                                                                                                                                                                                                                                                                            |
| <b>82) Paracetamol (acetaminofen)</b>                                                                                        | <input type="checkbox"/> 0. Never<br><input type="checkbox"/> 1.Only occasionally<br><input type="checkbox"/> 2. Regularly or intermittently<br><input type="checkbox"/> 1.For 1 month or more (___ months)<br><input type="checkbox"/> 2.Less than a month (___ weeks)<br><input type="checkbox"/> 3.Daily<br><input type="checkbox"/> 1.For a week or more (___ week)<br><input type="checkbox"/> 2.Less than a week (___ days) |
| <b>83) Could you tell me where was the pain?</b>                                                                             | <hr/>                                                                                                                                                                                                                                                                                                                                                                                                                             |
| <b>84) Have you received antibiotics for injection more than a week?</b><br><br><b>Show catalogue</b> (gentamicin, amikacin) | <input type="checkbox"/> 0.Never<br><input type="checkbox"/> 1.Only occasionally<br><input type="checkbox"/> 2. Regularly or intermittently<br><input type="checkbox"/> 3.Daily                                                                                                                                                                                                                                                   |
| <b>85) Could you tell me for what kind of infection?</b>                                                                     | <hr/>                                                                                                                                                                                                                                                                                                                                                                                                                             |
| <b>86) Do you take or have you taken Furosemide, phenazopyridine?</b><br><br><b>Show catalogue</b>                           | <input type="checkbox"/> 0.Never<br><input type="checkbox"/> 1.Only occasionally<br><input type="checkbox"/> 2. Regularly or intermittently<br><input type="checkbox"/> 3.Daily                                                                                                                                                                                                                                                   |
| <b>87) Do you drink a medication for high blood pressure?</b>                                                                | <input type="checkbox"/> 1.Yes <input type="checkbox"/> 2.No                                                                                                                                                                                                                                                                                                                                                                      |

**FAMILY BACKGROUND**

|                                                                              |                                                                                                                                                                                   |                                                                                                                                                                                                                                                            |
|------------------------------------------------------------------------------|-----------------------------------------------------------------------------------------------------------------------------------------------------------------------------------|------------------------------------------------------------------------------------------------------------------------------------------------------------------------------------------------------------------------------------------------------------|
| <b>88) Has a family member been diagnosed with CKD (Currently or before)</b> | 1. Father _____<br>2. Mother _____<br>3. Brothers (# _____)<br>4. Sisters (# _____)<br>5. Cousins (# _____)<br>6. Nephews (# _____)<br>7. Nieces (# _____)<br>8. Uncles (# _____) | <b>89) Has he worked in agriculture?</b><br><input type="checkbox"/> 1.Yes <input type="checkbox"/> 2.No<br><b>a)</b> Father _____<br><b>b)</b> Mother _____<br><b>c)</b> Brothers (# _____)<br><b>d)</b> Sisters (# _____)<br><b>e)</b> Cousins (# _____) |
|------------------------------------------------------------------------------|-----------------------------------------------------------------------------------------------------------------------------------------------------------------------------------|------------------------------------------------------------------------------------------------------------------------------------------------------------------------------------------------------------------------------------------------------------|

|  |                       |                                                                                                                                                                                                                                                                                                                                                                                                                                                                                                                      |
|--|-----------------------|----------------------------------------------------------------------------------------------------------------------------------------------------------------------------------------------------------------------------------------------------------------------------------------------------------------------------------------------------------------------------------------------------------------------------------------------------------------------------------------------------------------------|
|  | <p><b>9. None</b></p> | <p><b>f) Nephews (# _____)</b><br/> <b>g) Nieces (# _____)</b><br/> <b>h) Uncles (# _____)</b></p> <p><b>90) Has he worked in sugarcane?</b></p> <p style="text-align: center;"><input type="checkbox"/> 1. Yes    <input type="checkbox"/> 2. No</p> <p><b>a) Father _____</b><br/> <b>b) Mother _____</b><br/> <b>c) Brothers (# _____)</b><br/> <b>d) Sisters (# _____)</b><br/> <b>e) Cousins (# _____)</b><br/> <b>f) Nephews (# _____)</b><br/> <b>g) Nieces (# _____)</b><br/> <b>h) Uncles (# _____)</b></p> |
|--|-----------------------|----------------------------------------------------------------------------------------------------------------------------------------------------------------------------------------------------------------------------------------------------------------------------------------------------------------------------------------------------------------------------------------------------------------------------------------------------------------------------------------------------------------------|

## PERSONAL HEALTH HISTORY

|                                                                                                                               |                                                                                                                                                                                                                                                                                                                                                                                                                                                                                                                                                                                                                                               |
|-------------------------------------------------------------------------------------------------------------------------------|-----------------------------------------------------------------------------------------------------------------------------------------------------------------------------------------------------------------------------------------------------------------------------------------------------------------------------------------------------------------------------------------------------------------------------------------------------------------------------------------------------------------------------------------------------------------------------------------------------------------------------------------------|
| <p><b>91) Have you been diagnosed with any of the following diseases: (confirmed by a physician and under treatment)?</b></p> | <p>a) High blood pressure <span style="float: right;">1. Yes <input type="checkbox"/> 2. No <input type="checkbox"/></span></p> <p>b) Diabetes <span style="float: right;">1. Yes <input type="checkbox"/> 2. No <input type="checkbox"/></span></p> <p>c) Nephrolithiasis <span style="float: right;">1. Yes <input type="checkbox"/> 2. No <input type="checkbox"/></span></p> <p>d) Arthritis <span style="float: right;">1. Yes <input type="checkbox"/> 2. No <input type="checkbox"/></span></p> <p>e) Other <span style="float: right;">1. Yes <input type="checkbox"/> 2. No <input type="checkbox"/></span></p> <p>Specify _____</p> |
| <p><b>92) Have you been medically diagnosed with urinary tract infection?</b></p>                                             | <p><input type="checkbox"/> 1. Yes    <input type="checkbox"/> 2. No    <i>(if it is no go to question 94)</i></p>                                                                                                                                                                                                                                                                                                                                                                                                                                                                                                                            |
| <p><b>93) If it is yes did they laboratory test the urine?</b></p>                                                            | <p><input type="checkbox"/> 1. Yes    <input type="checkbox"/> 2. No</p>                                                                                                                                                                                                                                                                                                                                                                                                                                                                                                                                                                      |
| <p><b>94) How many times have you had urinary tract infections in the last year?</b></p>                                      | <p><input type="text"/> <input type="text"/></p>                                                                                                                                                                                                                                                                                                                                                                                                                                                                                                                                                                                              |
| <p><b>95) How long ago was the last time you had a urinary tract infection?</b></p>                                           | <p><input type="text"/> <input type="text"/> months</p>                                                                                                                                                                                                                                                                                                                                                                                                                                                                                                                                                                                       |
| <p><b>96) Do you have a spouse or partner?</b></p>                                                                            | <p><input type="checkbox"/> 1. Yes    <input type="checkbox"/> 2. No</p>                                                                                                                                                                                                                                                                                                                                                                                                                                                                                                                                                                      |
| <p><b>97) If it is yes, do you or your partner intend to get pregnant?</b></p>                                                | <p><input type="checkbox"/> 1. Yes    <input type="checkbox"/> 2. No</p>                                                                                                                                                                                                                                                                                                                                                                                                                                                                                                                                                                      |
| <p><b>98) How long have you been trying to get got pregnant?</b></p>                                                          | <p><input type="text"/> <input type="text"/> months</p>                                                                                                                                                                                                                                                                                                                                                                                                                                                                                                                                                                                       |
| <p><b>99) How many children do you have?</b></p>                                                                              | <p>Still births <input type="text"/> <input type="text"/>      Abortions <input type="text"/> <input type="text"/></p>                                                                                                                                                                                                                                                                                                                                                                                                                                                                                                                        |

# BASELINE QUESTIONNAIRE | 2014

|                                                                 |                                                                                                        |
|-----------------------------------------------------------------|--------------------------------------------------------------------------------------------------------|
| <b>100) Did you or your wife get pregnant easily?</b>           | <input type="checkbox"/> 1.Yes <input type="checkbox"/> 2.No                                           |
| <b>101) How long ago was you got the last pregnancy?</b>        | <input type="text"/> <input type="text"/> months                                                       |
| <b>102) Have you used birth control?</b>                        | <input type="checkbox"/> 1.Yes <input type="checkbox"/> 2.No                                           |
| <b>103) Have you been diagnosed with infertility?</b>           | <input type="checkbox"/> 1.Yes <input type="checkbox"/> 2.No                                           |
| <b>104) Have you had premature birth?</b>                       | <input type="checkbox"/> 1.Yes <input type="checkbox"/> 2.No                                           |
| <b>105) If it is yes, how premature were they?</b>              | <input type="text"/> <input type="text"/> weeks                                                        |
| <b>106) Have you had a child who was small at birth?</b>        | <input type="checkbox"/> 1.Yes <input type="checkbox"/> 2.No                                           |
| <b>HEAT STRESS AND DEHYDRATION SYMPTOMS</b>                     |                                                                                                        |
| <b>107) Have you fainted or passed out due to heat?</b>         | <input type="checkbox"/> 1.Yes <input type="checkbox"/> 2.No <i>(If it is yes, go to question 110)</i> |
| <b>108) If it is yes, has it been on your job?</b>              | <input type="checkbox"/> 1.Yes <input type="checkbox"/> 2.No                                           |
| <b>109) If it is yes, what task were you doing?</b>             | _____                                                                                                  |
| <b>110) Have you lost weight in the last 6 months?</b>          | <input type="checkbox"/> 1.Yes <input type="checkbox"/> 2.No <i>(if it is yes, go to question 114)</i> |
| <b>111) If it is yes, in what circumstance?</b>                 | 1. Working, Specify _____<br>2. Doing exercise or sport<br>3. Other, specify _____                     |
| <b>112) How many pounds have you lost in the last 6 months?</b> | <input type="text"/> <input type="text"/> lbs                                                          |
| <b>113) What frame time have you lost that weight?</b>          | 1. _____ days<br>2. _____ weeks<br>3. _____ months                                                     |

|                                                                                                                    |                                                                                                     |
|--------------------------------------------------------------------------------------------------------------------|-----------------------------------------------------------------------------------------------------|
| <b>114) Could you tell me if you have seen the aristolochia plant or the flower that I show in the catalogue)?</b> | <input type="checkbox"/> 1.Yes <input type="checkbox"/> 2.No                                        |
| <b>115) If it is yes, where have you seen it grow?</b>                                                             | _____<br>_____                                                                                      |
| <b>116) Does it grow in sugarcane fields?</b>                                                                      | <input type="checkbox"/> 1.Yes <input type="checkbox"/> 2.No <input type="checkbox"/> 9.Do not know |

**Have you experienced any of the following symptoms in the last 6 months?**

| Symptoms                                                |                                                                                                 | How often (check with a circle)                                                                                        |
|---------------------------------------------------------|-------------------------------------------------------------------------------------------------|------------------------------------------------------------------------------------------------------------------------|
| <b>1) Extremely dry mouth</b>                           | <input type="checkbox"/> 1.Yes<br><br>Today? Yes __, no __<br><br><input type="checkbox"/> 2.No | Almost every day or every day<br><br>At least once a week<br><br>Several times a month<br><br>Once during these months |
| <b>2) Burning sensation while urinating or Chistata</b> | <input type="checkbox"/> 1.Yes<br><br>Today? Yes __, no __<br><br><input type="checkbox"/> 2.No | Almost every day or every day<br><br>At least once a week<br><br>Several times a month<br><br>Once during these months |
| <b>3) Very little urine</b>                             | <input type="checkbox"/> 1.Yes<br><br>Today? Yes __, no __<br><br><input type="checkbox"/> 2.No | Almost every day or every day<br><br>At least once a week<br><br>Several times a month<br><br>Once during these months |
| <b>4) Very dark urine</b>                               | <input type="checkbox"/> 1.Yes<br><br>Today? Yes __, no __<br><br><input type="checkbox"/> 2.No | Almost every day or every day<br><br>At least once a week<br><br>Several times a month<br><br>Once during these months |
| <b>5) Cramps</b>                                        | <input type="checkbox"/> 1.Yes                                                                  | Almost every day or every day                                                                                          |

# BASELINE QUESTIONNAIRE | 2014

| Symptoms                                                  |                                                                                                 | How often (check with a circle)                                                                                        |
|-----------------------------------------------------------|-------------------------------------------------------------------------------------------------|------------------------------------------------------------------------------------------------------------------------|
|                                                           | Today? Yes __, no __<br><br><input type="checkbox"/> 2.No                                       | At least once a week<br><br>Several times a month<br><br>Once during these months                                      |
| 6) Headache                                               | <input type="checkbox"/> 1.Yes<br><br>Today? Yes __, no __<br><br><input type="checkbox"/> 2.No | Almost every day or every day<br><br>At least once a week<br><br>Several times a month<br><br>Once during these months |
| 7) Palpitations (feeling your heart is beating very fast) | <input type="checkbox"/> 1.Yes<br><br>Today? Yes __, no __<br><br><input type="checkbox"/> 2.No | Almost every day or every day<br><br>At least once a week<br><br>Several times a month<br><br>Once during these months |
| 8) Fever                                                  | <input type="checkbox"/> 1.Yes<br><br>Today? Yes __, no __<br><br><input type="checkbox"/> 2.No | Almost every day or every day<br><br>At least once a week<br><br>Several times a month<br><br>Once during these months |
| 9) Muscle weakness                                        | <input type="checkbox"/> 1.Yes<br><br>Today? Yes __, no __<br><br><input type="checkbox"/> 2.No | Almost every day or every day<br><br>At least once a week<br><br>Several times a month<br><br>Once during these months |
| 10) Inflammation of hands or feet                         | <input type="checkbox"/> 1.Yes<br><br>Today? Yes __, no __<br><br><input type="checkbox"/> 2.No | Almost every day or every day<br><br>At least once a week<br><br>Several times a month<br><br>Once during these months |
| 11) Nausea                                                | <input type="checkbox"/> 1.Yes<br><br>Today? Yes __, no __                                      | Almost every day or every day<br><br>At least once a week                                                              |

# BASELINE QUESTIONNAIRE | 2014

| Symptoms                                    |                                                                                         | How often (check with a circle)                                                                            |
|---------------------------------------------|-----------------------------------------------------------------------------------------|------------------------------------------------------------------------------------------------------------|
|                                             | <input type="checkbox"/> 2.No                                                           | Several times a month<br>Once during these months                                                          |
| 12) Rapid breathing or difficulty breathing | <input type="checkbox"/> 1.Yes<br>Today? Yes __, no __<br><input type="checkbox"/> 2.No | Almost every day or every day<br>At least once a week<br>Several times a month<br>Once during these months |
| 13) Dizziness                               | <input type="checkbox"/> 1.Yes<br>Today? Yes __, no __<br><input type="checkbox"/> 2.No | Almost every day or every day<br>At least once a week<br>Several times a month<br>Once during these months |
| 14) Fainting, passing out                   | <input type="checkbox"/> 1.Yes<br>Today? Yes __, no __<br><input type="checkbox"/> 2.No | Almost every day or every day<br>At least once a week<br>Several times a month<br>Once during these months |
| 15) Diarrhoea                               | <input type="checkbox"/> 1.Yes<br>Today? Yes __, no __<br><input type="checkbox"/> 2.No | Almost every day or every day<br>At least once a week<br>Several times a month<br>Once during these months |
| 16) Vomiting                                | <input type="checkbox"/> 1.Yes<br>Today? Yes __, no __<br><input type="checkbox"/> 2.No | Almost every day or every day<br>At least once a week<br>Several times a month<br>Once during these months |
| 17) Nose bleed                              | <input type="checkbox"/> 1.Yes<br>Today? Yes __, no __<br><input type="checkbox"/> 2.No | Almost every day or every day<br>At least once a week<br>Several times a month                             |



| Symptoms                                              |                                                                                         | How often (check with a circle)                                                                            |
|-------------------------------------------------------|-----------------------------------------------------------------------------------------|------------------------------------------------------------------------------------------------------------|
|                                                       |                                                                                         | Once during these months                                                                                   |
| 18) Stomach ache                                      | <input type="checkbox"/> 1.Yes<br>Today? Yes __, no __<br><input type="checkbox"/> 2.No | Almost every day or every day<br>At least once a week<br>Several times a month<br>Once during these months |
| 19) Ear ache                                          | <input type="checkbox"/> 1.Yes<br>Today? Yes __, no __<br><input type="checkbox"/> 2.No | Almost every day or every day<br>At least once a week<br>Several times a month<br>Once during these months |
| 20. Extremely tired (much more than normal tiredness) | <input type="checkbox"/> 1.Yes<br>Today? Yes __, no __<br><input type="checkbox"/> 2.No | Almost every day or every day<br>At least once a week<br>Several times a month<br>Once during these months |
| 21. Confusion                                         | <input type="checkbox"/> 1.Yes<br>Today? Yes __, no __<br><input type="checkbox"/> 2.No | Almost every day or every day<br>At least once a week<br>Several times a month<br>Once during these months |

# BASELINE QUESTIONNAIRE | 2014

## MATRIX FOR LIQUID CONSUMPTION

| USUAL 24 HOUR LIQUID INTAKE |                         |                                  |                                                     |          |                                           |          |                                   |              |
|-----------------------------|-------------------------|----------------------------------|-----------------------------------------------------|----------|-------------------------------------------|----------|-----------------------------------|--------------|
| Liquids consumed            | Sugar added             | At home before work Litres or CC | Litres or CC brought from home to work and consumed |          | Litres or CC obtained or supplied at work |          | Litters or CC ingested after work | Observations |
|                             |                         |                                  | brought                                             | Consumed | Obtained/supplied                         | Consumed |                                   |              |
| Water                       |                         |                                  |                                                     |          |                                           |          |                                   |              |
| Natural fruit drinks        | None<br>Little<br>A lot |                                  |                                                     |          |                                           |          |                                   |              |
| Sodas                       |                         |                                  |                                                     |          |                                           |          |                                   |              |
| Energy drinks               |                         |                                  |                                                     |          |                                           |          |                                   |              |
| Isotonic drink or bolis     |                         |                                  |                                                     |          |                                           |          |                                   |              |
| Coffee/ta                   | None<br>Little<br>A lot |                                  |                                                     |          |                                           |          |                                   |              |
| Milk                        | None<br>Little<br>A lot |                                  |                                                     |          |                                           |          |                                   |              |
| Other liquids:<br>Soup      |                         |                                  |                                                     |          |                                           |          |                                   |              |
|                             |                         |                                  |                                                     |          |                                           |          |                                   |              |
|                             |                         |                                  |                                                     |          |                                           |          |                                   |              |

Thank you!
